# Supplementary material for: Clinical Efficacy and Safety of Sodium Thiosulfate in the Treatment of Uremic Pruritus: A Meta-Analysis of Randomized Controlled Trials
Source: MDPI journal article supplement (doi:10.3390/toxins13110769), 2021-10-30
Supplement: s1 [file s1]

# **Supplementary Materials: Clinical Efficacy and Safety of Sodium Thiosulfate in the Treatment of Uremic Pruritus: A Meta-Analysis of Randomized Controlled Trials**

Ping-Hsun Lu, Hui-En Chuo, Ko-Lin Kuo, Jian-Fu Liao and Po-Hsuan Lu

**Table S1.** Grade profile summary of ‘STS for UP’ Quality assessment

| Certainty assessment |                   |              |               |              |             |                                     | № of patients   |         | Effect            |                                           | Certainty        | Importance |
|----------------------|-------------------|--------------|---------------|--------------|-------------|-------------------------------------|-----------------|---------|-------------------|-------------------------------------------|------------------|------------|
| № of studies         | Study design      | Risk of bias | Inconsistency | Indirectness | Imprecision | Other considerations                | Pruritus scores | placebo | Relative (95% CI) | Absolute (95% CI)                         |                  |            |
| pruritus scores      |                   |              |               |              |             |                                     |                 |         |                   |                                           |                  |            |
| 4                    | randomised trials | serious      | serious       | not serious  | not serious | publication bias strongly suspected | 111             | 111     | -                 | SMD 3.52 lower (5.63 lower to 1.41 lower) | ⊕○○○<br>VERY LOW | IMPORTANT  |
| Certainty assessment |                   |              |               |              |             |                                     | № of patients   |         | Effect            |                                           | Certainty        | Importance |
| № of studies         | Study design      | Risk of bias | Inconsistency | Indirectness | Imprecision | Other considerations                | PSQI            | placebo | Relative (95% CI) | Absolute (95% CI)                         |                  |            |

**Pittsburgh sleep quality index**

---

| Certainty assessment |                   |              |               |              |             |                                     | № of patients   |         | Effect            |                                         | Certainty   | Importance |
|----------------------|-------------------|--------------|---------------|--------------|-------------|-------------------------------------|-----------------|---------|-------------------|-----------------------------------------|-------------|------------|
| № of studies         | Study design      | Risk of bias | Inconsistency | Indirectness | Imprecision | Other considerations                | Pruritus scores | placebo | Relative (95% CI) | Absolute (95% CI)                       |             |            |
| 2                    | randomised trials | serious      | not serious   | not serious  | not serious | publication bias strongly suspected | 58              | 58      | -                 | MD 4.7 lower (4.93 lower to 4.48 lower) | ⊕⊕○○<br>LOW | IMPORTANT  |

| Certainty assessment |              |              |               |              |             |                      | № of patients  |         | Effect            |                   | Certainty | Importance |
|----------------------|--------------|--------------|---------------|--------------|-------------|----------------------|----------------|---------|-------------------|-------------------|-----------|------------|
| № of studies         | Study design | Risk of bias | Inconsistency | Indirectness | Imprecision | Other considerations | Effective rate | placebo | Relative (95% CI) | Absolute (95% CI) |           |            |

Effective rate

|   |                   |         |             |             |             |                                     |               |               |                          |                                                |             |           |
|---|-------------------|---------|-------------|-------------|-------------|-------------------------------------|---------------|---------------|--------------------------|------------------------------------------------|-------------|-----------|
| 2 | randomised trials | serious | not serious | not serious | not serious | publication bias strongly suspected | 50/53 (94.3%) | 27/53 (50.9%) | OR 18.52 (4.94 to 69.38) | 441 more per 1,000 (from 327 more to 477 more) | ⊕⊕○○<br>LOW | IMPORTANT |
|---|-------------------|---------|-------------|-------------|-------------|-------------------------------------|---------------|---------------|--------------------------|------------------------------------------------|-------------|-----------|

| Certainty assessment |              |              |               |              |             |                      | № of patients |         | Effect            |                   | Certainty | Importance |
|----------------------|--------------|--------------|---------------|--------------|-------------|----------------------|---------------|---------|-------------------|-------------------|-----------|------------|
| № of studies         | Study design | Risk of bias | Inconsistency | Indirectness | Imprecision | Other considerations | ADR           | placebo | Relative (95% CI) | Absolute (95% CI) |           |            |

Adverse drug reaction

|   |                   |         |         |             |         |                                     |              |             |                         |                                               |                  |           |
|---|-------------------|---------|---------|-------------|---------|-------------------------------------|--------------|-------------|-------------------------|-----------------------------------------------|------------------|-----------|
| 3 | randomised trials | serious | serious | not serious | serious | publication bias strongly suspected | 9/83 (10.8%) | 3/83 (3.6%) | RR 2.44 (0.37 to 15.99) | 52 more per 1,000 (from 23 fewer to 542 more) | ⊕○○○<br>VERY LOW | IMPORTANT |
|---|-------------------|---------|---------|-------------|---------|-------------------------------------|--------------|-------------|-------------------------|-----------------------------------------------|------------------|-----------|

| Certainty assessment |              |              |               |              |             |                      | № of patients |         | Effect            |                   | Certainty | Importance |
|----------------------|--------------|--------------|---------------|--------------|-------------|----------------------|---------------|---------|-------------------|-------------------|-----------|------------|
| № of studies         | Study design | Risk of bias | Inconsistency | Indirectness | Imprecision | Other considerations | Lab           | placebo | Relative (95% CI) | Absolute (95% CI) |           |            |

Serum creatinine

|   |                   |             |              |             |         |                                     |    |    |   |                                                |                  |           |
|---|-------------------|-------------|--------------|-------------|---------|-------------------------------------|----|----|---|------------------------------------------------|------------------|-----------|
| 2 | randomised trials | not serious | very serious | not serious | serious | publication bias strongly suspected | 51 | 51 | - | MD 63.49 lower (256.36 lower to 129.38 higher) | ⊕○○○<br>VERY LOW | IMPORTANT |
|---|-------------------|-------------|--------------|-------------|---------|-------------------------------------|----|----|---|------------------------------------------------|------------------|-----------|

Blood urea nitrogen

| Certainty assessment |                   |              |               |              |             |                                     | № of patients |         | Effect            |                                          | Certainty        | Importance |
|----------------------|-------------------|--------------|---------------|--------------|-------------|-------------------------------------|---------------|---------|-------------------|------------------------------------------|------------------|------------|
| № of studies         | Study design      | Risk of bias | Inconsistency | Indirectness | Imprecision | Other considerations                | Lab           | placebo | Relative (95% CI) | Absolute (95% CI)                        |                  |            |
| 2                    | randomised trials | not serious  | very serious  | not serious  | serious     | publication bias strongly suspected | 51            | 51      | -                 | MD 2.4 lower (8.58 lower to 3.79 higher) | ⊕○○○<br>VERY LOW | IMPORTANT  |

#### Albumin

|   |                   |             |             |             |         |                                     |    |    |   |                                          |             |           |
|---|-------------------|-------------|-------------|-------------|---------|-------------------------------------|----|----|---|------------------------------------------|-------------|-----------|
| 2 | randomised trials | not serious | not serious | not serious | serious | publication bias strongly suspected | 58 | 58 | - | MD 2.99 lower (5.13 lower to 0.86 lower) | ⊕⊕○○<br>LOW | IMPORTANT |
|---|-------------------|-------------|-------------|-------------|---------|-------------------------------------|----|----|---|------------------------------------------|-------------|-----------|

#### Calcium

| Certainty assessment |                   |              |               |              |             |                                     | № of patients |         | Effect            |                                           | Certainty        | Importance |
|----------------------|-------------------|--------------|---------------|--------------|-------------|-------------------------------------|---------------|---------|-------------------|-------------------------------------------|------------------|------------|
| № of studies         | Study design      | Risk of bias | Inconsistency | Indirectness | Imprecision | Other considerations                | Lab           | placebo | Relative (95% CI) | Absolute (95% CI)                         |                  |            |
| 2                    | randomised trials | not serious  | serious       | not serious  | serious     | publication bias strongly suspected | 51            | 51      | -                 | MD 0.22 lower (0.56 lower to 0.13 higher) | ⊕○○○<br>VERY LOW | IMPORTANT  |

#### Phosphorus

|   |                   |             |         |             |         |                                     |    |    |   |                                          |                  |           |
|---|-------------------|-------------|---------|-------------|---------|-------------------------------------|----|----|---|------------------------------------------|------------------|-----------|
| 2 | randomised trials | not serious | serious | not serious | serious | publication bias strongly suspected | 51 | 51 | - | MD 0.14 lower (0.58 lower to 0.3 higher) | ⊕○○○<br>VERY LOW | IMPORTANT |
|---|-------------------|-------------|---------|-------------|---------|-------------------------------------|----|----|---|------------------------------------------|------------------|-----------|

#### Parathyroid hormone

---



| Certainty assessment |                   |              |               |              |             |                                     | Nº of patients |         | Effect            |                                             | Certainty        | Importance |
|----------------------|-------------------|--------------|---------------|--------------|-------------|-------------------------------------|----------------|---------|-------------------|---------------------------------------------|------------------|------------|
| Nº of studies        | Study design      | Risk of bias | Inconsistency | Indirectness | Imprecision | Other considerations                | Lab            | placebo | Relative (95% CI) | Absolute (95% CI)                           |                  |            |
| 2                    | randomised trials | not serious  | serious       | not serious  | serious     | publication bias strongly suspected | 51             | 51      | -                 | MD 22.2 lower (84.35 lower to 39.95 higher) | ⊕○○○<br>VERY LOW | IMPORTANT  |

CI: confidence interval; MD: mean difference; OR = odds ratio; RR = risk ratio; STS = sodium thiosulphate; UP = uremic pruritus.
