# Supplementary material for: Clinical Efficacy and Safety of Sodium Thiosulfate in the Treatment of Uremic Pruritus: A Meta-Analysis of Randomized Controlled Trials
Source: Toxins (Basel). 2021 Oct 30;13(11):769. doi: 10.3390/toxins13110769 (PMC8624535; doi:10.3390/toxins13110769)
Supplement: Supplementary file 1 [file toxins-13-00769-s001.zip › Table S2. STS for UP search protocol_ supplementary data.xlsx]

## Sheet: PubMed
Search number	Query	Sort By	Filters	Search Details	Results	Time
6	((#3) AND (pruritus OR Pruritis OR itch* OR xerosis OR skin problems OR skin disorders)) AND (uremic clearance OR uremic clearance granule OR Niaoduqing OR Niaoduqing Particles OR Niaoduqing KeLi)			((((((((((((((("renal insufficiency, chronic"[MeSH Terms] OR (("renal"[All Fields] AND "insufficiency"[All Fields]) AND "chronic"[All Fields])) OR "chronic renal insufficiency"[All Fields]) OR (("chronic"[All Fields] AND "kidney"[All Fields]) AND "disease"[All Fields])) OR "chronic kidney disease"[All Fields]) OR (((("kidney"[MeSH Terms] OR "kidney"[All Fields]) OR "kidneys"[All Fields]) OR "kidn…	19	03:17:37	#3 AND #4 AND #5
5	uremic clearance OR uremic clearance granule OR Niaoduqing OR Niaoduqing Particles OR Niaoduqing KeLi			((((((("uraemic"[All Fields] OR "uraemics"[All Fields]) OR "uremic"[All Fields]) OR "uremics"[All Fields]) AND ("clearance"[All Fields] OR "clearances"[All Fields])) OR (((("uraemic"[All Fields] OR "uraemics"[All Fields]) OR "uremic"[All Fields]) OR "uremics"[All Fields]) AND ("clearance"[All Fields] OR "clearances"[All Fields]) AND ((((((((((((((("cytoplasmic granules"[MeSH Terms] OR ("cytoplasm…	1313	03:16:25
4	Pruritus OR Pruritis OR itch* OR xerosis OR skin problems OR skin disorders			((((("pruritus"[MeSH Terms] OR "pruritus"[All Fields]) OR (("pruritus"[MeSH Terms] OR "pruritus"[All Fields]) OR "pruritis"[All Fields])) OR "itch*"[All Fields]) OR "xerosis"[All Fields]) OR (("skin"[MeSH Terms] OR "skin"[All Fields]) AND (("problem"[All Fields] OR "problem s"[All Fields]) OR "problems"[All Fields]))) OR (((("skin diseases"[MeSH Terms] OR ("skin"[All Fields] AND "diseases"[All Fi…	1111947	03:16:06
3	#1 OR #2			((((((((((((("renal insufficiency, chronic"[MeSH Terms] OR (("renal"[All Fields] AND "insufficiency"[All Fields]) AND "chronic"[All Fields])) OR "chronic renal insufficiency"[All Fields]) OR (("chronic"[All Fields] AND "kidney"[All Fields]) AND "disease"[All Fields])) OR "chronic kidney disease"[All Fields]) OR (((("kidney"[MeSH Terms] OR "kidney"[All Fields]) OR "kidneys"[All Fields]) OR "kidney…	452742	03:15:56
2	uremic OR Uremia OR uremias			"uraemic"[All Fields] OR "uraemics"[All Fields] OR "uremic"[All Fields] OR "uremics"[All Fields] OR "uraemia"[All Fields] OR "uremia"[MeSH Terms] OR "uremia"[All Fields] OR "uremias"[All Fields] OR "uraemia"[All Fields] OR "uremia"[MeSH Terms] OR "uremia"[All Fields] OR "uremias"[All Fields]	38841	03:15:35
1	chronic kidney disease OR kidney injury OR kidney failure OR chronic renal failure OR end-stage renal disease OR end stage renal disease OR dialysis OR hemodialysis OR peritoneal dialysis			((((((((((("renal insufficiency, chronic"[MeSH Terms] OR (("renal"[All Fields] AND "insufficiency"[All Fields]) AND "chronic"[All Fields])) OR "chronic renal insufficiency"[All Fields]) OR (("chronic"[All Fields] AND "kidney"[All Fields]) AND "disease"[All Fields])) OR "chronic kidney disease"[All Fields]) OR (((("kidney"[MeSH Terms] OR "kidney"[All Fields]) OR "kidneys"[All Fields]) OR "kidney s…	437043	03:15:16
	標註粗體底線者為MeSH term

## Sheet: Cochrane Library
Search Name:
Date Run:	09/06/2020 08:31:05
Comment:
ID	Search	Hits
#1	chronic kidney disease OR kidney injury OR kidney failure OR chronic renal failure OR end-stage renal disease OR end stage renal disease OR dialysis OR hemodialysis OR peritoneal dialysis	41347
#2	uremic OR Uremia OR uremias	1913
#3	#1 OR #2	41726
#4	Pruritus OR Pruritis OR itch* OR xerosis OR skin problems OR skin disorders	21739
#5	uremic clearance OR uremic clearance granule OR Niaoduqing OR Niaoduqing Particles OR Niaoduqing KeLi	160
#6	#3 AND #4 AND #5	10
	其中有一篇歸屬於Special collection的 "Neglected tropical diseases: the top five"無法匯出至EndNote	https://www.cochranelibrary.com/collections/doi/10.1002/14651858.SC000021/full

## Sheet: Embase
No.	Query	Results	Date
#6	#3 AND #4 AND #5	63	2020-06-12
#5	'uremic clearance' OR (uremic AND ('clearance'/exp OR clearance)) OR 'uremic clearance granule' OR (uremic AND ('clearance'/exp OR clearance) AND ('granule'/exp OR granule)) OR niaoduqing OR 'niaoduqing particles' OR (niaoduqing AND particles) OR 'niaoduqing keli' OR (niaoduqing AND keli)	1700	2020-06-12
#4	'pruritus'/exp OR pruritus OR 'pruritis'/exp OR pruritis OR itch* OR 'xerosis'/exp OR xerosis OR 'skin problems' OR (('skin'/exp OR skin) AND problems) OR 'skin disorders' OR (('skin'/exp OR skin) AND ('disorders'/exp OR disorders))	1122405	2020-06-12
#3	#1 OR #2	800359	2020-06-12
#2	uremic OR 'uremia'/exp OR uremia OR uremias	53482	2020-06-12
#1	'chronic kidney disease'/exp OR 'chronic kidney disease' OR (chronic AND ('kidney'/exp OR kidney) AND ('disease'/exp OR disease)) OR 'kidney injury'/exp OR 'kidney injury' OR (('kidney'/exp OR kidney) AND ('injury'/exp OR injury)) OR 'kidney failure'/exp OR 'kidney failure' OR (('kidney'/exp OR kidney) AND ('failure'/exp OR failure)) OR 'chronic renal failure'/exp OR 'chronic renal failure' OR (c…	790936	2020-06-12

## Sheet: CINAHL
	Wednesday, June 10, 2020 2:19:18 AM
#	查詢	設限值/擴增詞	上次執行透過	結果
S6	S3 AND S4 AND S5	擴增詞 - 套用相等主題	介面 - EBSCOhost Research Databases	2
		檢索模式 - 尋找全部檢索詞語	檢索畫面 - 進階檢索
			資料庫 - CINAHL
S5	uremic clearance OR uremic clearance granule OR Niaoduqing OR Niaoduqing Particles OR Niaoduqing KeLi	擴增詞 - 套用相等主題	介面 - EBSCOhost Research Databases	94
		檢索模式 - 尋找全部檢索詞語	檢索畫面 - 進階檢索
			資料庫 - CINAHL
S4	Pruritus OR Pruritis OR itch* OR xerosis OR skin problems OR skin disorders	擴增詞 - 套用相等主題	介面 - EBSCOhost Research Databases	27313
		檢索模式 - 尋找全部檢索詞語	檢索畫面 - 進階檢索
			資料庫 - CINAHL
S3	S1 OR S2	擴增詞 - 套用相等主題	介面 - EBSCOhost Research Databases	91429
		檢索模式 - 尋找全部檢索詞語	檢索畫面 - 進階檢索
			資料庫 - CINAHL
S2	uremic OR Uremia OR uremias	擴增詞 - 套用相等主題	介面 - EBSCOhost Research Databases	4043
		檢索模式 - 尋找全部檢索詞語	檢索畫面 - 進階檢索
			資料庫 - CINAHL
S1	chronic kidney disease OR kidney injury OR kidney failure OR chronic renal failure OR end-stage renal disease OR end stage renal disease OR dialysis OR hemodialysis OR peritoneal dialysis	擴增詞 - 套用相等主題	介面 - EBSCOhost Research Databases	89747
		檢索模式 - 尋找全部檢索詞語	檢索畫面 - 進階檢索
			資料庫 - CINAHL

## Sheet: ClinicalTrials.gov
Condition or disease	uremic OR Uremia OR Uremias OR Atypical Hemolytic Uremic Syndrome
Other terms	Sodium thiosulfate OR sodium thiosulphate
搜尋結果為3篇

## Sheet: ClinicalTrials.gov (2)
Condition or disease	uremic OR Uremia OR Uremias OR Atypical Hemolytic Uremic Syndrome
Other terms	pruritus OR pruritus OR Pruritis OR itch OR xerosis OR skin problems OR skin disorders
Intervention/treatment:	Sodium thiosulfate OR sodium thiosulphate
搜尋結果為0篇

## Sheet: 華藝
chronic kidney disease OR kidney failure OR dialysis OR 透析 OR 血透 OR 腹透 OR 腎衰竭 OR 腎功能衰竭 OR 腎功能不全 OR 腎小球腎炎 OR 腎炎 OR uremic OR Uremia OR uremias OR 尿毒	篇名.關鍵字.摘要
pruritus OR Pruritis OR itch* OR xerosis OR Skin Diseases OR 皮膚搔癢 OR 搔癢 OR 癢	篇名.關鍵字.摘要
uremic clearance OR Niaoduqing OR Niaoduqing KeLi OR 尿毒清颗粒 OR 尿毒清	篇名.關鍵字.摘要
三項以AND串連共搜尋到19篇文獻
搜尋指令為以下
((chronic kidney disease OR kidney failure OR dialysis OR 透析 OR 血透 OR 腹透 OR 腎衰竭 OR 腎功能衰竭 OR 腎功能不全 OR 腎小球腎炎 OR 腎炎 OR uremic OR Uremia OR uremias OR 尿毒)) = 篇名.關鍵字.摘要 AND ((pruritus OR Pruritis OR itch* OR xerosis OR Skin Diseases OR 皮膚搔癢 OR 搔癢 OR 癢)) = 篇名.關鍵字.摘要 AND ((uremic clearance OR Niaoduqing OR Niaoduqing KeLi OR 尿毒清颗粒 OR 尿毒清)) = 篇名.關鍵字.摘要

## Sheet: 萬方
檢索策略	("透析" or "血透" or "腹透" or "腎衰竭" or "腎功能衰竭" or "腎功能不全" or "腎小球腎炎" or "腎炎" or "尿毒") and ("皮膚搔癢" or "搔癢" or 癢) and ("尿毒清顆粒" or "尿毒清")	都以[全文]欄位搜尋共27篇 有2篇重複，僅能匯出25筆至EndNote
檢索指令	("透析" or "血透" or "腹透" or "腎衰竭" or "腎功能衰竭" or "腎功能不全" or "腎小球腎炎" or "腎炎" or "尿毒") ("皮膚搔癢" or "搔癢" or 癢) ("尿毒清顆粒" or "尿毒清")

## Sheet: CNKI
Search	Query	Items found
#1	硫代硫酸鈉	417
#2	瘙痒	7160
#3	硫代硫酸鈉 AND 瘙痒	4
